# Supplementary material for: A reactive oxygen species-responsive antioxidant nanotherapy for the treatment of drug-induced tissue and organ injury
Source: Royal Society of Chemistry journal article supplement (doi:10.1039/d0bm01660h), 2020-01-01
Supplement: d0bm01660h1.pdf [file d0bm01660h1.pdf]

**Electronic supplementary information for**

**A reactive oxygen species-responsive antioxidant nanotherapy for the treatment of drug-induced tissue and organ injury**

Chenwen Li,<sup>†a</sup> Ying Hu,<sup>†a,b</sup> Qiang Nie,<sup>†a</sup> Shuguang Chen,<sup>c</sup> Gang Li,<sup>a</sup> Lanlan Li,<sup>a</sup> Sheng Chen,<sup>\*d</sup> Bo Tang<sup>\*b</sup> and Jianxiang Zhang<sup>\*a,e</sup>

<sup>a</sup> *Department of Pharmaceutics, College of Pharmacy, Third Military Medical University (Army Medical University), Chongqing 400038, China*

<sup>b</sup> *Department of General Surgery, Southwest Hospital, Third Military Medical University (Army Medical University), Chongqing 400038, China*

<sup>c</sup> *Department of Dermatology, Southwest Hospital, Third Military Medical University (Army Medical University), Chongqing 400038, China*

<sup>d</sup> *Department of Pediatrics, Southwest Hospital, Third Military Medical University (Army Medical University), Chongqing 400038, China*

<sup>e</sup> *State Key Lab of Trauma, Burn and Combined Injury, Third Military Medical University (Army Medical University), Chongqing 400038, China*

<sup>†</sup> *These authors contributed equally to this work.*

**Corresponding authors:**

Jianxiang Zhang, PhD, Prof.

Department of Pharmaceutics, College of Pharmacy  
Third Military Medical University (Army Medical University)  
30 Gaotanyan Main Street, Chongqing 400038, China  
E-mail: jxzhang1980@gmail.com

Bo Tang, PhD, Prof.

Department of General Surgery, Southwest Hospital  
Third Military Medical University (Army Medical University)  
30 Gaotanyan Main Street, Chongqing 400038, China  
E-mail: 2211934029@qq.com

Sheng Chen, PhD, Prof.

Department of Pediatrics, Southwest Hospital  
Third Military Medical University (Army Medical University)  
30 Gaotanyan Main Street, Chongqing 400038, China  
E-mail: chenshengerk@163.com

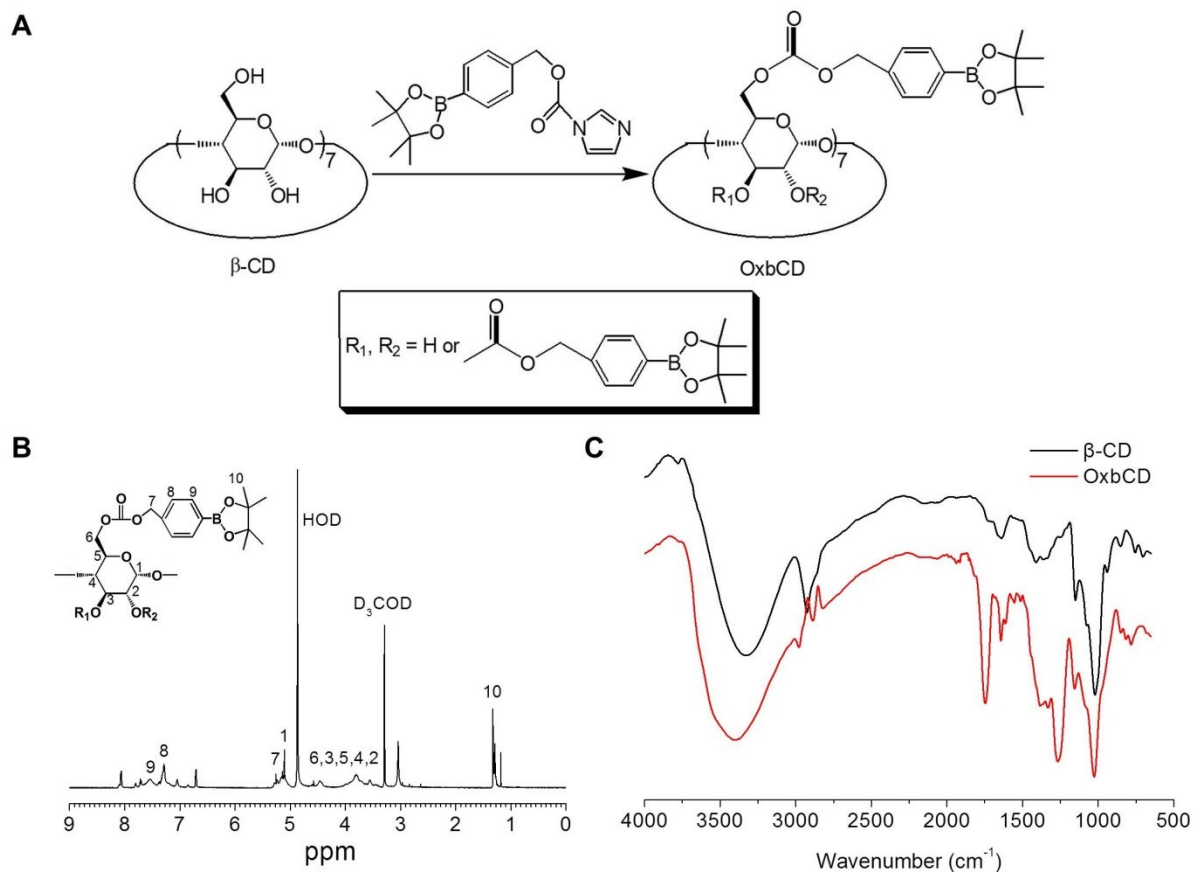

**Figure S1.** Synthesis and characterization of a ROS-responsive material OxbCD. (A) Schematic illustration of synthesis of OxbCD from a cyclic oligosaccharide  $\beta$ -cyclodextrin ( $\beta$ -CD). (B-C) Characterization of OxbCD by  $^1\text{H}$  NMR (B) and FT-IR (C) spectroscopy. In the image (B),  $R_1$  and  $R_2$  represent the groups of -H or 4-(acyloxymethyl) phenylboronic acid pinacol ester as indicated in the image (A).

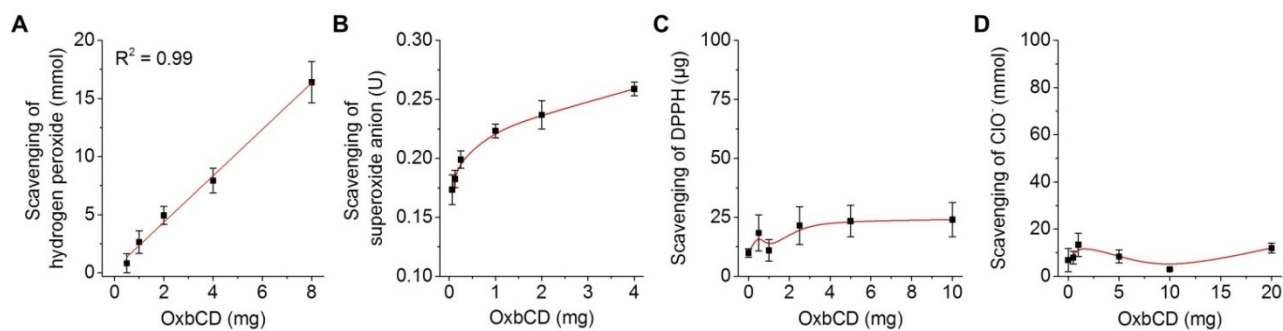

**Figure S2.** ROS-scavenging capability of OxbCD. (A-B) Elimination of  $\text{H}_2\text{O}_2$  (A) and superoxide anion (B) by OxbCD. (C) Free radical-scavenging efficiency of OxbCD examined by 2,2-diphenyl-2-picrylhydrazyl (DPPH) assay. (D) Elimination of hypochlorite by OxbCD. Data are presented as mean  $\pm$  SE ( $n = 3$ ).

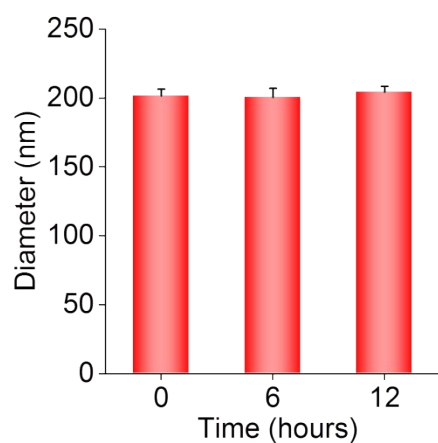

**Figure S3.** Colloidal stability of TON in serum. Mean hydrodynamic diameters of TON were measured after incubation in serum for varied time periods at 37°C. Data are presented as mean  $\pm$  SE (n = 3).

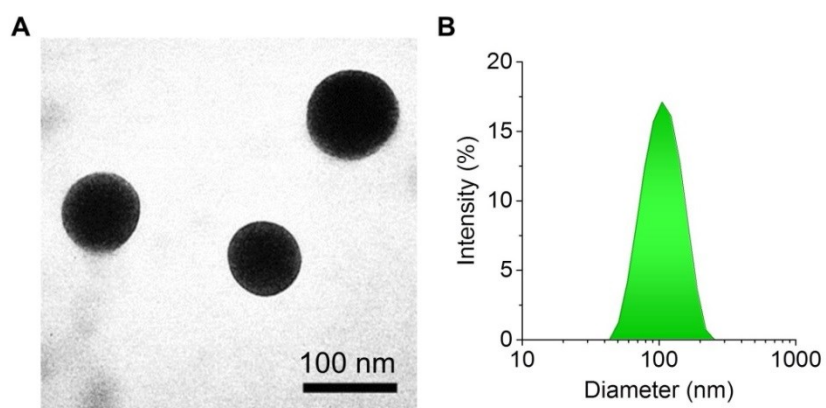

**Figure S4.** Characterization of Cy7.5-labeled OxbCD nanoparticles (Cy7.5-ON). (A-B) The TEM image (A) and size distribution profile (B) of Cy7.5-ON.

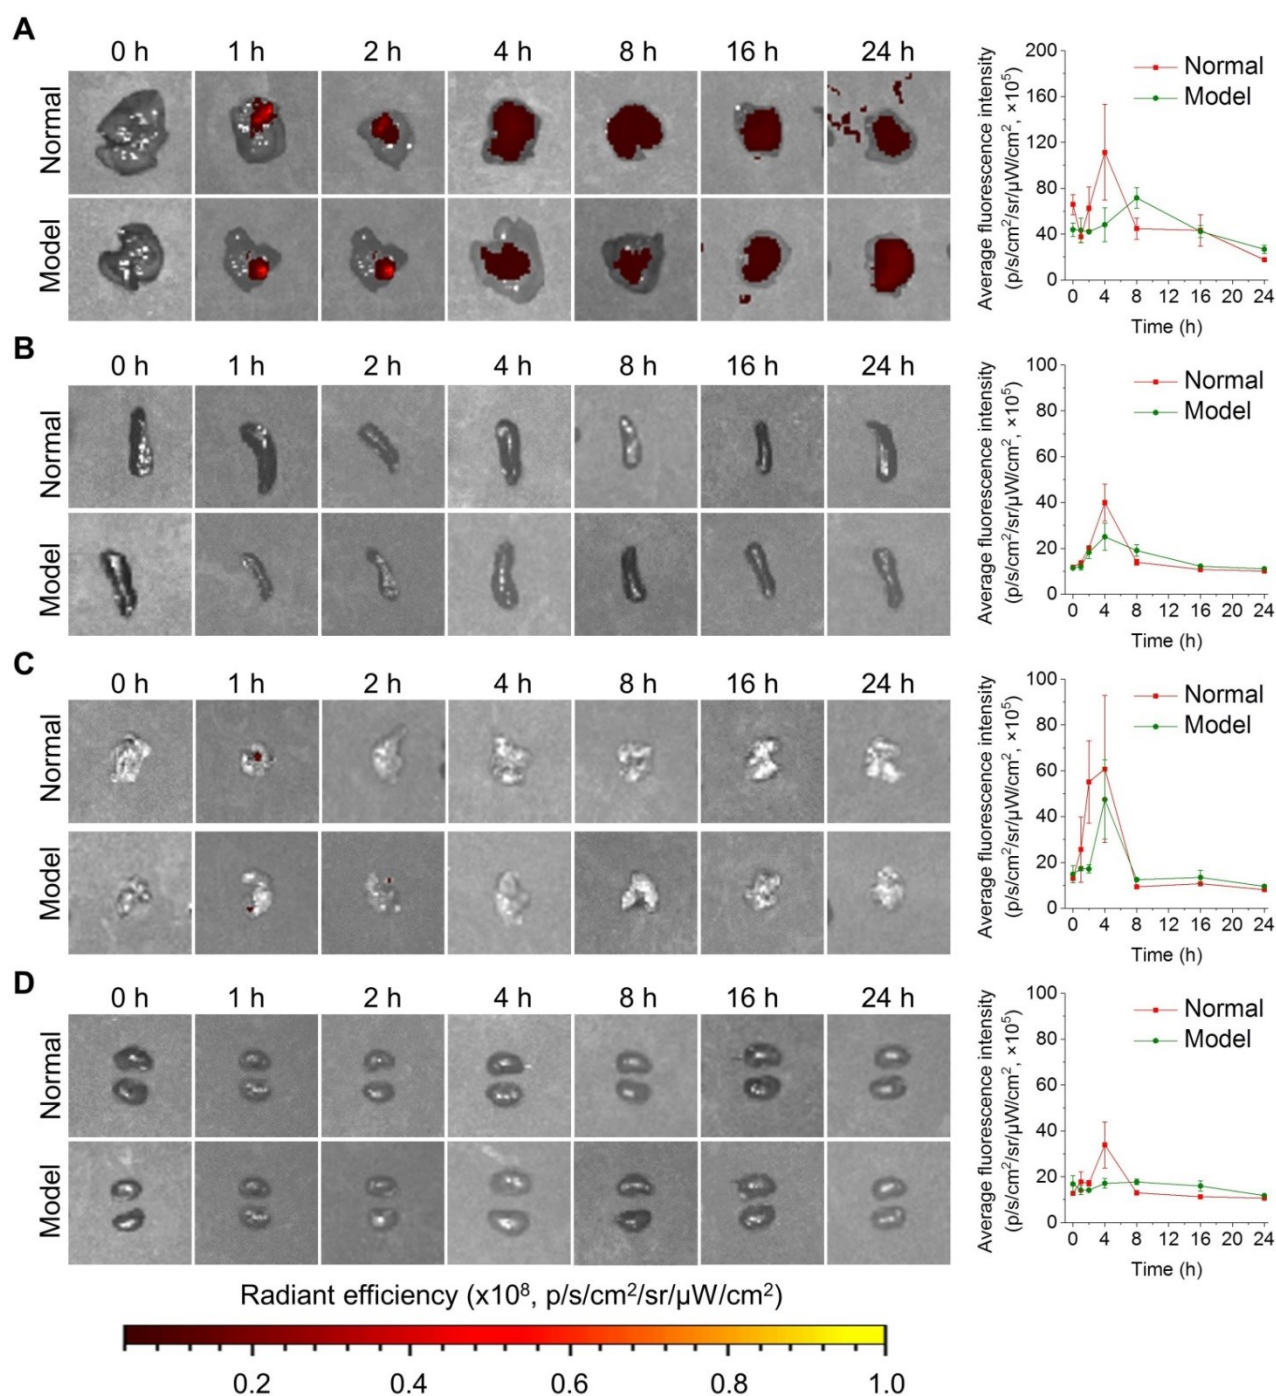

**Figure S5.** Biodistribution of Cy7.5-ON in representative major organs. (A-D) *Ex vivo* images (left) and quantitative data (right) of the liver (A), spleen (B), lung (C), and kidneys (D) after oral administration in mice with or without IND-induced gastrointestinal injury. BALB/c mice received a single oral administration of Cy7.5-ON. After 1 h, oral administration of IND or saline was performed. Major organs were isolated for *ex vivo* imaging. Data are presented as mean  $\pm$  SE ( $n = 3$ ).

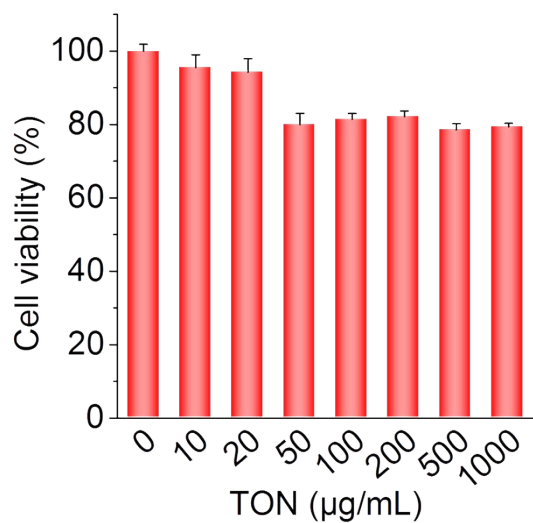

**Figure S6.** Cell viability of TON in RAW264.7 macrophages. After 12 h of incubation with various doses of TON, cell viability of RAW264.7 cells was quantified by MTT. Data are presented as mean  $\pm$  SE ( $n = 6$ ).

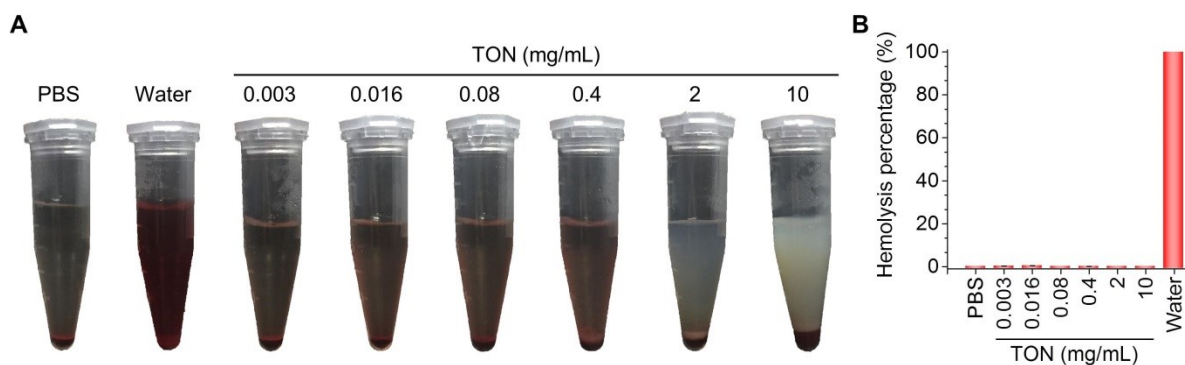

**Figure S7.** Hemolysis evaluation of TON using fresh erythrocytes collected from Sprague-Dawley rats. (A) Representative digital photos showing erythrocytes that were mixed with saline (negative control), TON at various concentrations, or pure water (positive control) and incubated at room temperature for 2 h. (B) The hemolysis degrees of various groups calculated by quantification of absorbance at 500 nm due to hemoglobin. Data in (B) are presented as mean  $\pm$  SE ( $n = 6$ ).
